# Supplementary material
Source: publisher site journal article supplement (http://static.cambridge.org/content/id/urn:cambridge.org:id:article:S002210901900108X/resource/name/S002210901900108Xsupp001.zip)
Supplement: Supplementary file 1 [file S002210901900108Xsupp001.zip]

Archive with 1 entries (1 files):
- Supplementary Material - UPDATED, PLEASE REPLACE.pdf
